# Supplementary material
Source: Springer Nature journal article supplement (https://www.springermedizin.de/resource/supplementary/12906_2011_433_MOESM5_ESM.pdf/9519770)

**A**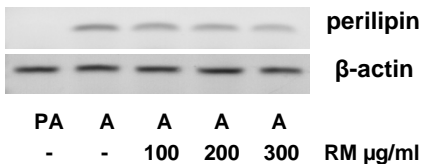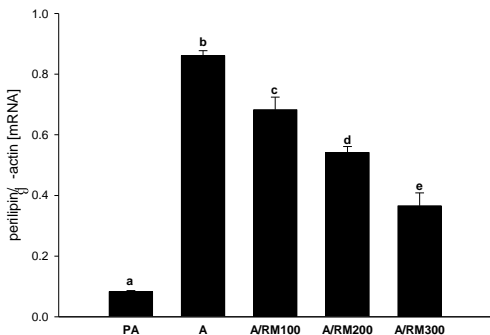**B**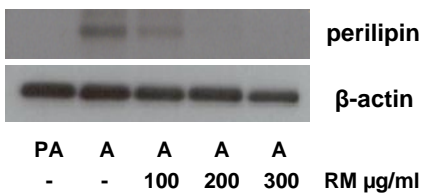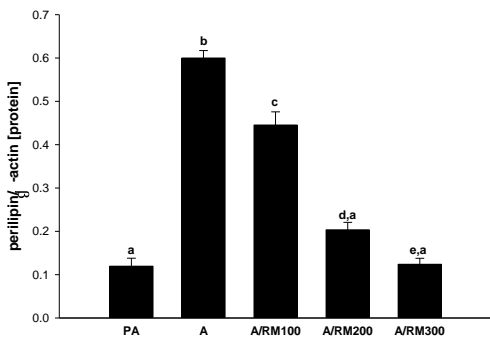

Supplement: MOESM5 [file 9519770]
